# Supplementary material for: The C terminus of Pcf11 forms a novel zinc-finger structure that plays an essential role in mRNA 3′-end processing
Source: PubMed Central journal article supplement — RNA. 2017 Jan;23(1):98–107. doi: 10.1261/rna.058354.116 (PMC5159653; doi:10.1261/rna.058354.116), 2017-01
Supplement: supp_058354.116_Supplemental_Fig_S1.pdf [file supp_058354.116_Supplemental_Fig_S1.pdf]

# Supplemental figure S1

## A

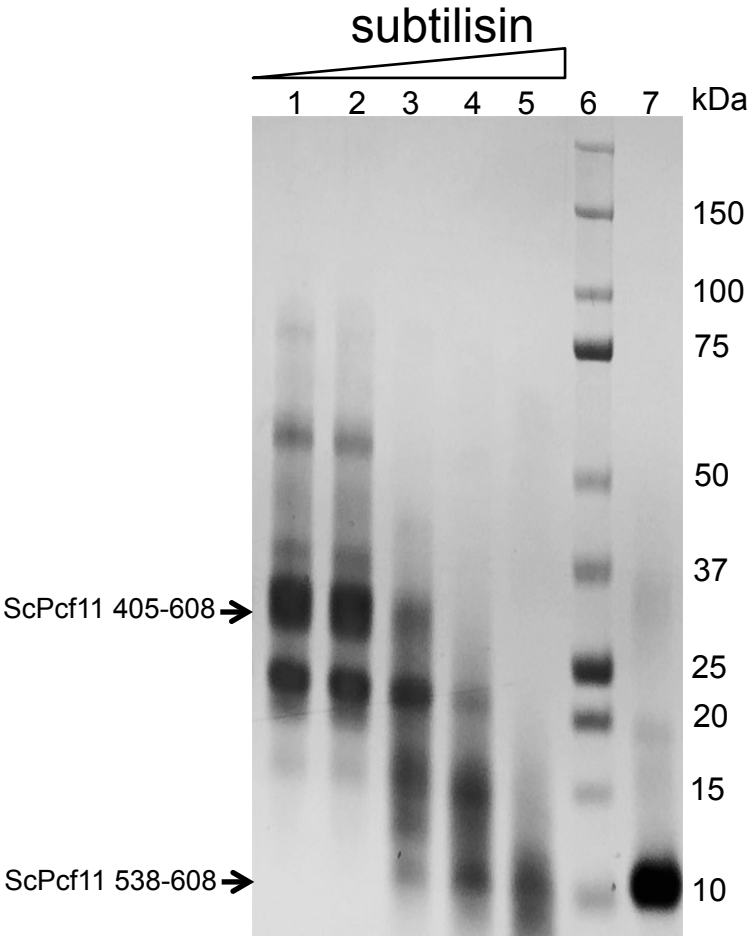

## B

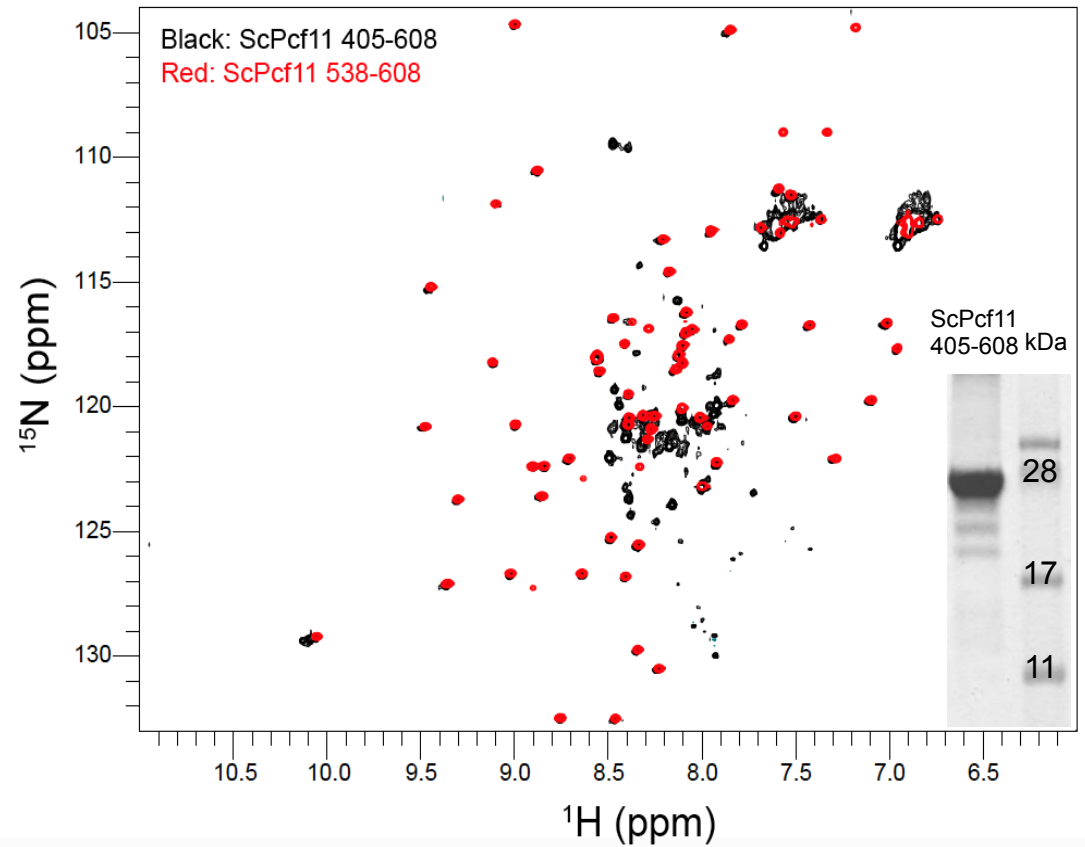

# Supplemental figure S1 legend

ScPcf11 538-608 folds into an independent structural domain without interaction with the rest of the C-terminus. (A) SDS-PAGE of ScPcf11 405-608 fragments digested by increasing concentrations of subtilisin for 30 minutes (purchased from Sigma-Aldrich). All digestions were carried out at 4°C in NMR buffer. The mass ratio of subtilisin to ScPcf11 405-608 from lane 1 to lane 5 is 0, 0.006, 0.02, 0.06, 0.2, respectively. Lane 7 was loaded with ScPcf11 538-608 as a control. (B) Overlay of  $^1\text{H}$ - $^{15}\text{N}$  HSQCs of freshly purified ScPcf11 405-608 (black) and ScPcf11 538-608 (red). SDS-PAGE image of the sample after recording the NMR spectrum is shown at the bottom right of the  $^1\text{H}$ - $^{15}\text{N}$  HSQC.
