# Supplementary material for: The C terminus of Pcf11 forms a novel zinc-finger structure that plays an essential role in mRNA 3′-end processing
Source: PubMed Central journal article supplement — RNA. 2017 Jan;23(1):98–107. doi: 10.1261/rna.058354.116 (PMC5159653; doi:10.1261/rna.058354.116), 2017-01
Supplement: supp_058354.116_Supplemental_Fig_S2.pdf [file supp_058354.116_Supplemental_Fig_S2.pdf]

# Supplemental figure S2

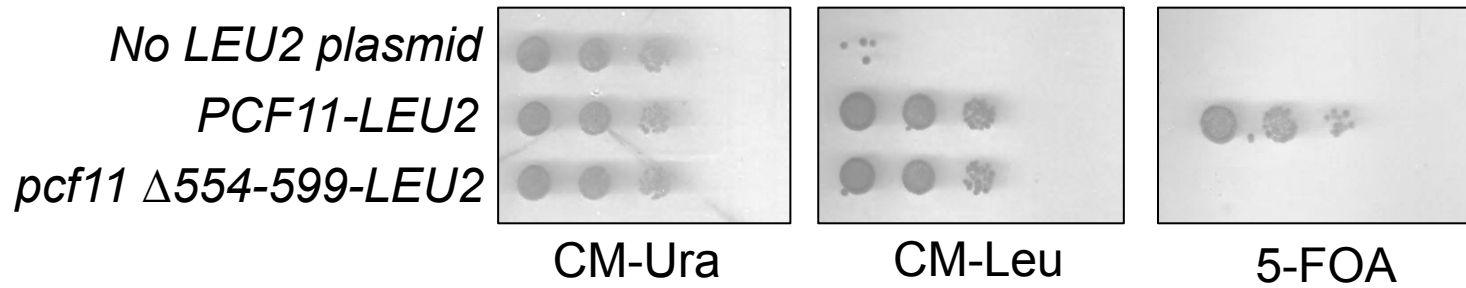

# Supplemental figure S2 legend

A *pcf11* variant lacking the C-terminal zinc finger is not viable. A strain with a deletion of the chromosomal *PCF11* gene and a covering wild-type *PCF11* on an *URA3*-containing plasmid was transformed with a *LEU2*-containing plasmid with either wild-type *PCF11* or *pcf11* with amino acids 554-599 deleted. Transformants were plated on the indicated media using a spot assay with sequential cell dilution. The deletion mutant cannot grow on medium containing 5-FOA, which forces loss of the covering *URA3*-containing plasmid.
