# Supplementary material for: The C terminus of Pcf11 forms a novel zinc-finger structure that plays an essential role in mRNA 3′-end processing
Source: PubMed Central journal article supplement — RNA. 2017 Jan;23(1):98–107. doi: 10.1261/rna.058354.116 (PMC5159653; doi:10.1261/rna.058354.116), 2017-01
Supplement: supp_058354.116_Supplemental_Fig_S3.pdf [file supp_058354.116_Supplemental_Fig_S3.pdf]

# Supplemental figure S3

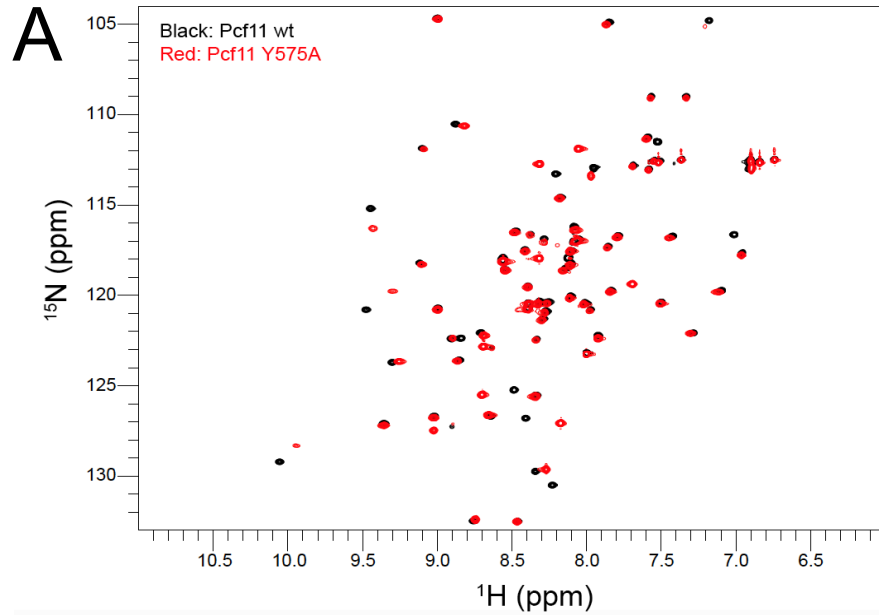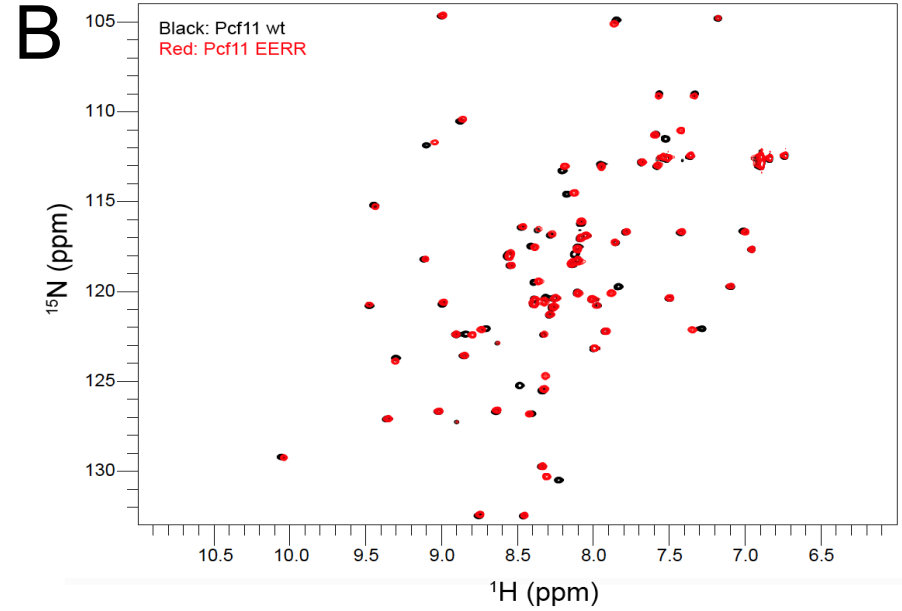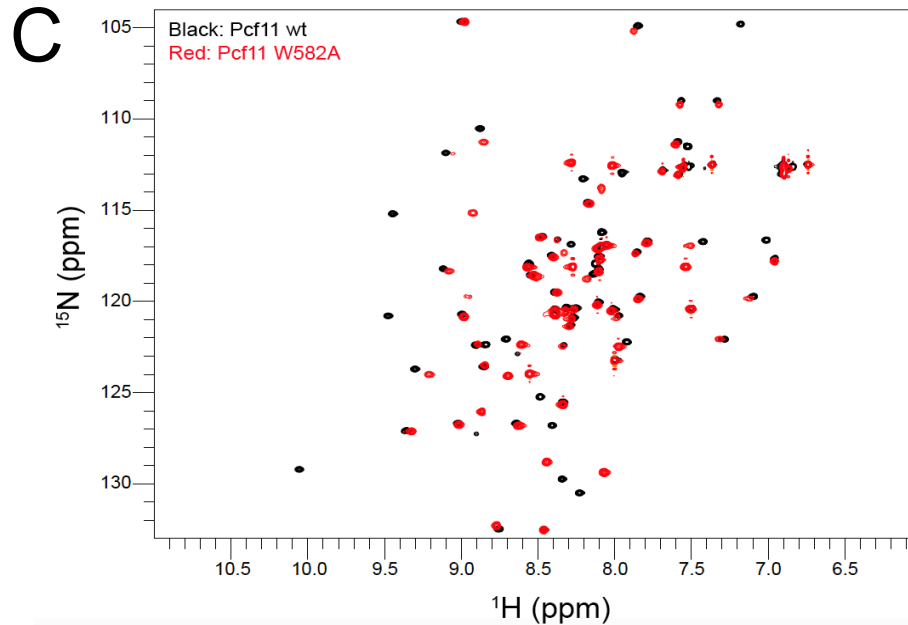

# Supplemental figure S3 legend

Overlays of  $^1\text{H}$ - $^{15}\text{N}$  HSQC of wild-type ScPcf11 538-608 (black) and  $^1\text{H}$ - $^{15}\text{N}$  HSQCs of mutated ScPcf11 538-608 (red), showing the structures of three mutants are conserved. (A) wild-type Pcf11 vs Pcf11-Y575A; (B) wild-type Pcf11 vs Pcf11-EERR; (C) wild-type Pcf11 vs Pcf11-W582A.
