# Supplementary material for: The C terminus of Pcf11 forms a novel zinc-finger structure that plays an essential role in mRNA 3′-end processing
Source: PubMed Central journal article supplement — RNA. 2017 Jan;23(1):98–107. doi: 10.1261/rna.058354.116 (PMC5159653; doi:10.1261/rna.058354.116), 2017-01
Supplement: supp_058354.116_Supplemental_Fig_S4.pdf [file supp_058354.116_Supplemental_Fig_S4.pdf]

# Supplemental figure S4

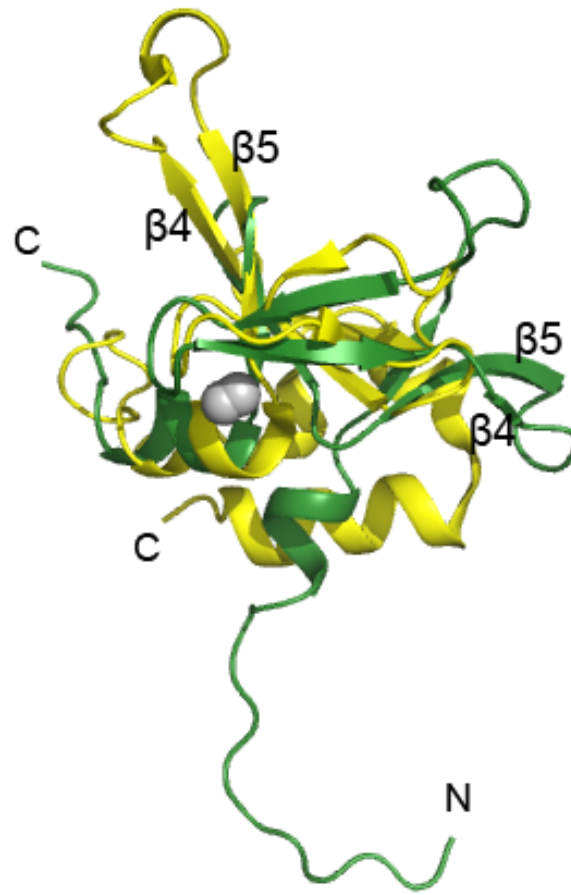

# Supplemental figure S4 legend

Structural comparison of the N-terminal zinc finger domain of PARP-1 in yellow (pdb #4AV1, chain A) and ScPcf11 538-608 in green.
